# Supplementary material for: Burdens and Resources of Staff of a Specialized Ward for Neuropalliative Care: A Cross-Sectional Survey
Source: MDPI journal article supplement (doi:10.3390/brainsci12121697), 2022-12-10
Supplement: s1 [file s1]

## Supplementary Material:

**Supplementary Material Table S1:** Modifications to the original questionnaire (Ateş et al. 2020, see Appendix, section 7.4, page 71-76)

| Original questionnaire                                                                                                                                                                                                                                                                                                                                             | Modifications                                                                                                                                                                                                                  |
|--------------------------------------------------------------------------------------------------------------------------------------------------------------------------------------------------------------------------------------------------------------------------------------------------------------------------------------------------------------------|--------------------------------------------------------------------------------------------------------------------------------------------------------------------------------------------------------------------------------|
| paper based                                                                                                                                                                                                                                                                                                                                                        | digital, web-based                                                                                                                                                                                                             |
| Wie stark fühlen Sie sich durch folgende Faktoren belastet?, page 71 ( <i>To what extent do you feel burdened by the following factors?</i> )                                                                                                                                                                                                                      |                                                                                                                                                                                                                                |
| Widersprüchliche Behandlungspläne im Versorgungsnetz (Question 16)                                                                                                                                                                                                                                                                                                 | Widersprüchliche Behandlungspläne im Versorgungsnetz (auf Station)<br>(we clarified by “auf Station” that the question addresses the work at the ward)                                                                         |
| Wie viele Sterbefälle im Rahmen Ihrer Arbeit halten Sie persönlich aus, ohne dass es zu einer Überlastung führt?, page 71 ( <i>How many deaths can you personally endure without becoming overwhelmed?</i> )                                                                                                                                                       |                                                                                                                                                                                                                                |
| Für alle Einrichtungen/Dienste außer ambulanter Hospizdienst ____ Patient*innen pro Woche<br>Für ambulante Hospizdienste ____ Patient*innen pro Monat                                                                                                                                                                                                              | ____ Patient*innen pro Woche<br><br>(the differentiation of bearable deaths between inpatient and outpatient care had a risk of being misunderstood, therefore question was simplified to only “patient per week” at the ward) |
| Wenn Sie an Patient*innen oder Zugehörige denken, welche Faktoren belasten Sie?, page 72 ( <i>When you think of patients or their relatives, what factors make you feel burdened?</i> )                                                                                                                                                                            |                                                                                                                                                                                                                                |
| Zerrissenheit / kein Zusammenhalt in der Familie (Question 7)                                                                                                                                                                                                                                                                                                      | Zerrissenheit / kein Zusammenhalt in der (betroffenen) Familie<br>(we clarified by “betroffenen” that the question addresses the patient’s family)                                                                             |
| Begleitung bei bestimmten Erkrankungen (Question 13)                                                                                                                                                                                                                                                                                                               | Die Begleitung von Patient*innen mit folgenden Erkrankungen empfinde ich als (leicht, stark oder sehr stark) belastend. (we specified the question)                                                                            |
| Haben sich Ihrer Einschätzung nach die Arbeitsbedingungen an Ihrem Arbeitsplatz/in Ihrem Ehrenamtlichen-Dienst seit Ihrer Anstellung/Ihrem Eintritt verbessert oder verschlechtert?, page 71 ( <i>In your opinion, have the working conditions at your place of work/in your voluntary service improved or deteriorated since you were hired/began?</i> )          |                                                                                                                                                                                                                                |
|                                                                                                                                                                                                                                                                                                                                                                    | Haben sich Ihrer Einschätzung nach die Arbeitsbedingungen an Ihrem aktuellen Arbeitsplatz geändert?<br><br>(we simplified the question “Do you think the working conditions at your current place of work have changed?”)      |
| Demographic data, page 75                                                                                                                                                                                                                                                                                                                                          |                                                                                                                                                                                                                                |
| <ul style="list-style-type: none"> <li>- Geschlecht (sex)</li> <li>- Wie alt sind Sie? ____ Alter in Jahren (<i>How old are you? ____ Age in years</i>)</li> <li>- Welches Herkunftsland haben Sie? (<i>What is your country of origin?</i>)</li> <li>- Welches Herkunftsland haben Ihre Eltern? (<i>What country of origin are your parents from?</i>)</li> </ul> | Staff surveys in our hospital require Human Resources approval. The approval was granted under the condition that information on sex, age and country of origin must not be collected.                                         |
| In welchem Umfang sind Sie derzeit im hier befragten Dienst beschäftigt? page 76 ( <i>To what extent are you currently employed in the service interviewed here?</i> )                                                                                                                                                                                             | In welchem Umfang sind Sie derzeit beschäftigt?                                                                                                                                                                                |

**Supplementary Material Table S2:** List of all questioned potential burdens.

| <b>Questioned potential burdens:</b>                          |                                                                    |
|---------------------------------------------------------------|--------------------------------------------------------------------|
| <i>patient- and relative-specific:</i>                        | <i>organizational, institutional, personal, collegial:</i>         |
| similarities with me or people close to me                    | too many patients                                                  |
| particularly close relationships with patients                | too few patients                                                   |
| particularly difficult relationships with patients            | accumulation of deaths in a certain period of time                 |
| too high demands of others on my care                         | no time to address wishes and problems of those affected           |
| other cultural background                                     | too short periods of accompaniment (<3 days) until death           |
| conflicts in the (affected) families                          | unexpected death of patients                                       |
| socially isolated patients                                    | Memories of deceased persons in their own environment              |
| particularly close relationships with patients' relatives     | not being able to accompany patients until they pass away          |
| particularly difficult relationships with patients' relatives | feelings of guilt                                                  |
| communication difficulties                                    | burden caused by suffering of colleagues                           |
| too high own demands on my care                               | burden caused by own suffering                                     |
| particularly difficult relationships with relatives           | patients with good prognosis rejecting suggested therapies         |
| low/lack of family support                                    | too little staff (incl. unfilled positions)                        |
|                                                               | too little time for rituals                                        |
|                                                               | high documentation effort                                          |
|                                                               | conflicting treatment plans within the care network                |
|                                                               | unsuccessful treatment of symptoms                                 |
|                                                               | start or continuation of therapies in patients with poor prognosis |

**Supplementary Material Table S3:** Stress symptoms shown by the team when confronted with death. Importance of symptoms was dichotomized in “not at all/slightly” and “(very) much”. \*not significant after p-value adjustment to  $p=0.004$  using Bonferroni-correction for multiple testing.

|                            | <b>NPC-ward</b>         |                |                  | <b>Neuro-ward</b>       |                |                  | <b>Fisher's exact test</b> |
|----------------------------|-------------------------|----------------|------------------|-------------------------|----------------|------------------|----------------------------|
|                            | Not at all/<br>slightly | (very)<br>much | Response<br>rate | Not at all/<br>slightly | (very)<br>much | Response<br>rate |                            |
| Speechlessness             | 85%                     | 15%            | 100%             | 77%                     | 23%            | 94%              | n.s.                       |
| Irritability               | 79%                     | 21%            | 95%              | 67%                     | 33%            | 94%              | n.s.                       |
| Increase in arguments      | 88%                     | 12%            | 85%              | 70%                     | 30%            | 94%              | n.s.                       |
| Accusations                | 80%                     | 20%            | 100%             | 71%                     | 29%            | 97%              | n.s.                       |
| Self-withdrawal            | 89%                     | 11%            | 95%              | 82%                     | 18%            | 88%              | n.s.                       |
| Excessive talkativeness    | 68%                     | 32%            | 95%              | 68%                     | 32%            | 97%              | n.s.                       |
| Rejection of usual rituals | 83%                     | 17%            | 90%              | 83%                     | 17%            | 91%              | n.s.                       |

|                                           |      |     |      |     |     |     |          |
|-------------------------------------------|------|-----|------|-----|-----|-----|----------|
| No involvement with other or new patients | 94%  | 6%  | 85%  | 87% | 13% | 97% | n.s.     |
| Cynicism                                  | 84%  | 16% | 95%  | 67% | 33% | 94% | n.s.     |
| Work-to-rule                              | 65%  | 35% | 85%  | 64% | 36% | 88% | n.s.     |
| No acceptance of offers of support        | 87%  | 13% | 80%  | 73% | 27% | 81% | n.s.     |
| Refusal of new admissions to ward         | 100% | 0%  | 80%  | 93% | 7%  | 94% | n.s.     |
| Increased interprofessional tensions      | 95%  | 5%  | 95%  | 68% | 32% | 97% | p=0.023* |
| Crying                                    | 94%  | 6%  | 100% | 87% | 13% | 97% | n.s.     |

**Supplementary Material Table S4:** Occurrence of physical and mental distress symptoms within the last four weeks on the NPC-ward and the Neuro-ward dichotomized in “never/occasionally” and “(very) often”. No statistically significant differences ( $p < 0.05$ ) were found.

|                                 | NPC-ward           |              | Neuro-ward         |              | Fisher's exact test |
|---------------------------------|--------------------|--------------|--------------------|--------------|---------------------|
|                                 | Never/occasionally | (very) often | Never/occasionally | (very) often |                     |
| Rushed or under time pressure   | 50%                | 50%          | 31%                | 69%          | n.s.                |
| Depressed                       | 65%                | 35%          | 65%                | 35%          | n.s.                |
| Calm and balanced               | 65%                | 35%          | 66%                | 34%          | n.s.                |
| A lot of energy                 | 70%                | 30%          | 63%                | 37%          | n.s.                |
| Physical pain                   | 65%                | 35%          | 65%                | 35%          | n.s.                |
| Completely exhausted after work | 40%                | 60%          | 44%                | 57%          | n.s.                |
| Sleep disturbances              | 60%                | 40%          | 56%                | 44%          | n.s.                |
